# Supplementary material for: An Ultra-Processed Food Dietary Pattern Is Associated with Lower Diet Quality in Portuguese Adults and the Elderly: The UPPER Project
Source: Nutrients. 2021 Nov 17;13(11):4119. doi: 10.3390/nu13114119 (PMC8619325; doi:10.3390/nu13114119)
Supplement: Supplementary file 1 [file nutrients-13-04119-s001.zip › nutrients-1453408-supplementary.pdf]

## Supplementary Materials:

**Table S1.** Odds ratio of being in the highest category of consumption of NOVA food subgroups for “Unhealthy” and “Diet concerns” dietary patterns (*versus* “Traditional” DP) among Portuguese population aged 18–84: The UPPER project.

|                                                                                                                  | Unhealthy DP                 | Diet concerns DP             |
|------------------------------------------------------------------------------------------------------------------|------------------------------|------------------------------|
|                                                                                                                  | Odds ratio (95% CI)          | Odds ratio (95% CI)          |
| <b>Unprocessed or minimally processed foods</b>                                                                  |                              |                              |
| Fruit                                                                                                            | <b>0.228 (0.179 - 0.290)</b> | 1.021 (0.770 - 1.355)        |
| Milk and plain yoghurt                                                                                           | 0.893 (0.674 - 1.183)        | 1.182 (0.929 - 1.503)        |
| Cereals                                                                                                          | 1.206 (0.975 - 1.491)        | <b>0.362 (0.285 - 0.460)</b> |
| Potatoes                                                                                                         | <b>0.248 (0.192 - 0.321)</b> | <b>0.213 (0.162 - 0.281)</b> |
| Other tubers and roots                                                                                           | <b>0.18 (0.139 - 0.234)</b>  | <b>0.619 (0.499 - 0.768)</b> |
| Vegetables and fungi                                                                                             | <b>0.074 (0.055 - 0.099)</b> | <b>0.284 (0.222 - 0.364)</b> |
| Eggs                                                                                                             | <b>0.654 (0.493 - 0.867)</b> | <b>0.538 (0.386 - 0.750)</b> |
| Pasta                                                                                                            | <b>1.635 (1.182 - 2.263)</b> | <b>0.612 (0.447 - 0.839)</b> |
| Legumes (beans)                                                                                                  | 0.791 (0.587 - 1.067)        | <b>0.597 (0.448 - 0.797)</b> |
| Fish and seafood                                                                                                 | <b>0.316 (0.241 - 0.413)</b> | <b>0.645 (0.504 - 0.826)</b> |
| Poultry                                                                                                          | 1.226 (0.967 - 1.553)        | <b>0.602 (0.456 - 0.795)</b> |
| Red meat                                                                                                         | 0.947 (0.757 - 1.184)        | <b>0.174 (0.134 - 0.226)</b> |
| Coffee/ tea, cocoa and substitutes                                                                               | <b>0.505 (0.383 - 0.667)</b> | 1.184 (0.918 - 1.527)        |
| Nuts and Seeds                                                                                                   | 0.937 (0.660 - 1.331)        | <b>1.704 (1.255 - 2.314)</b> |
| Fresh fruit juices and smoothies                                                                                 | <b>1.724 (1.129 - 2.633)</b> | 1.342 (0.871 - 2.069)        |
| <b>Processed culinary ingredients</b>                                                                            |                              |                              |
| Table sugar [Honey, molasses, syrups]                                                                            | 1.010 (0.798 - 1.278)        | <b>0.381 (0.306 - 0.475)</b> |
| Olive oil                                                                                                        | <b>0.109 (0.082 - 0.145)</b> | <b>0.099 (0.070 - 0.138)</b> |
| Other plant oil                                                                                                  | <b>1.354 (1.047 - 1.751)</b> | <b>0.218 (0.156 - 0.305)</b> |
| Animal fats                                                                                                      | <b>1.403 (1.109 - 1.775)</b> | <b>0.689 (0.517 - 0.919)</b> |
| Other processed culinary ingredients [vinegar, gelatin]                                                          | <b>0.439 (0.352 - 0.548)</b> | <b>0.324 (0.249 - 0.423)</b> |
| Cooking salt                                                                                                     | <b>0.127 (0.096 - 0.168)</b> | <b>0.047 (0.033 - 0.065)</b> |
| <b>Processed foods</b>                                                                                           |                              |                              |
| Cheese                                                                                                           | 1.012 (0.772 - 1.325)        | 0.889 (0.693 - 1.140)        |
| Ham and other salted, smoked or canned meat or fish                                                              | <b>0.422 (0.304 - 0.585)</b> | <b>0.467 (0.351 - 0.620)</b> |
| Preserved vegetables and legumes                                                                                 | <b>2.072 (1.652 - 2.599)</b> | <b>0.643 (0.465 - 0.887)</b> |
| Preserved fruits and sweetened or salted nuts                                                                    | 0.956 (0.697 - 1.311)        | 1.310 (0.965 - 1.776)        |
| Beer and Wine                                                                                                    | <b>0.470 (0.360 - 0.615)</b> | <b>0.203 (0.157 - 0.262)</b> |
| Breads, rice/corn crackers and popcorn                                                                           | <b>0.442 (0.343 - 0.571)</b> | <b>0.390 (0.297 - 0.511)</b> |
| Cake and desserts, condensed milk and sweetened yogurt                                                           | <b>3.310 (2.349 - 4.665)</b> | <b>1.640 (1.031 - 2.610)</b> |
| Nectars                                                                                                          | <b>2.967 (1.903 - 4.624)</b> | 0.788 (0.491 - 1.265)        |
| <b>Ultra-processed foods</b>                                                                                     |                              |                              |
| Carbonated beverages                                                                                             | <b>6.803 (5.146 - 8.994)</b> | <b>0.556 (0.381 - 0.812)</b> |
| Fruit and vegetable-based beverages                                                                              | <b>1.614 (1.126 - 2.314)</b> | 1.203 (0.866 - 1.670)        |
| Other sugar-sweetened beverages                                                                                  | <b>3.572 (2.691 - 4.742)</b> | <b>0.367 (0.230 - 0.585)</b> |
| Yogurt and milk-based drinks [Includes soy-, whey- based drinks, lactose free drinks, flavoured milk and shakes] | <b>2.233 (1.731 - 2.881)</b> | <b>2.377 (1.886 - 2.995)</b> |
| Distilled alcoholic beverages and flavoured ciders                                                               | <b>1.722 (1.25 - 2.373)</b>  | <b>0.316 (0.207 - 0.481)</b> |
| Industrial breads and toasts                                                                                     | <b>2.621 (2.003 - 3.428)</b> | 1.226 (0.930 - 1.617)        |
| Breakfast cereals                                                                                                | <b>1.828 (1.073 - 3.115)</b> | 1.579 (0.971 - 2.569)        |

|                                                                                                                            |                               |                              |
|----------------------------------------------------------------------------------------------------------------------------|-------------------------------|------------------------------|
| Confectionery [Includes all candy, chocolate, toffee, caramel, gelatin-based fruit sweets]                                 | <b>1.821 (1.357 - 2.444)</b>  | 0.747 (0.499 - 1.117)        |
| Cookies and biscuits/ Packaged sweet snacks                                                                                | <b>1.814 (1.367 - 2.407)</b>  | 0.976 (0.651 - 1.462)        |
| Crips, chips and crackers/ Packaged savory snacks                                                                          | <b>1.830 (1.196 - 2.800)</b>  | <b>2.888 (1.922 - 4.339)</b> |
| Cakes and desserts [Includes pastries, rolls, ice-cream, muffins, brownies, puddings, tarts, sweet pies, jelly]            | <b>1.834 (1.307 - 2.571)</b>  | 1.234 (0.888 - 1.713)        |
| Sausage and reconstituted meat products [Includes nuggets, spam, quorn, fish or crab sticks, plant-based meat substitutes] | <b>2.091 (1.683 - 2.598)</b>  | <b>0.402 (0.300 - 0.539)</b> |
| Ready-to-eat and ready-to-heat foods                                                                                       | <b>2.534 (1.956 - 3.282)</b>  | 0.897 (0.664 - 1.212)        |
| Ultra-processed cheese, margarine and other spreads                                                                        | 1.166 (0.878 - 1.547)         | 0.916 (0.686 - 1.223)        |
| Sauces, dressings and gravies [Includes bouillon cubes, gravy granules, all kinds of salad dressing]                       | <b>7.858 (5.586 - 11.056)</b> | 1.428 (0.907 - 2.248)        |

---

Statistically significant associations are highlighted in bold; ORs presented have the Traditional dietary pattern ( $n = 1379$ ; 35.8%%) as the reference category (the ORs = 1 are not shown for brevity).
